# Supplementary material
Source: publisher figshare collection journal article supplement (https://frontiersin.figshare.com/ndownloader/files/26209079)
Supplement: Supplementary file [file 26209079]

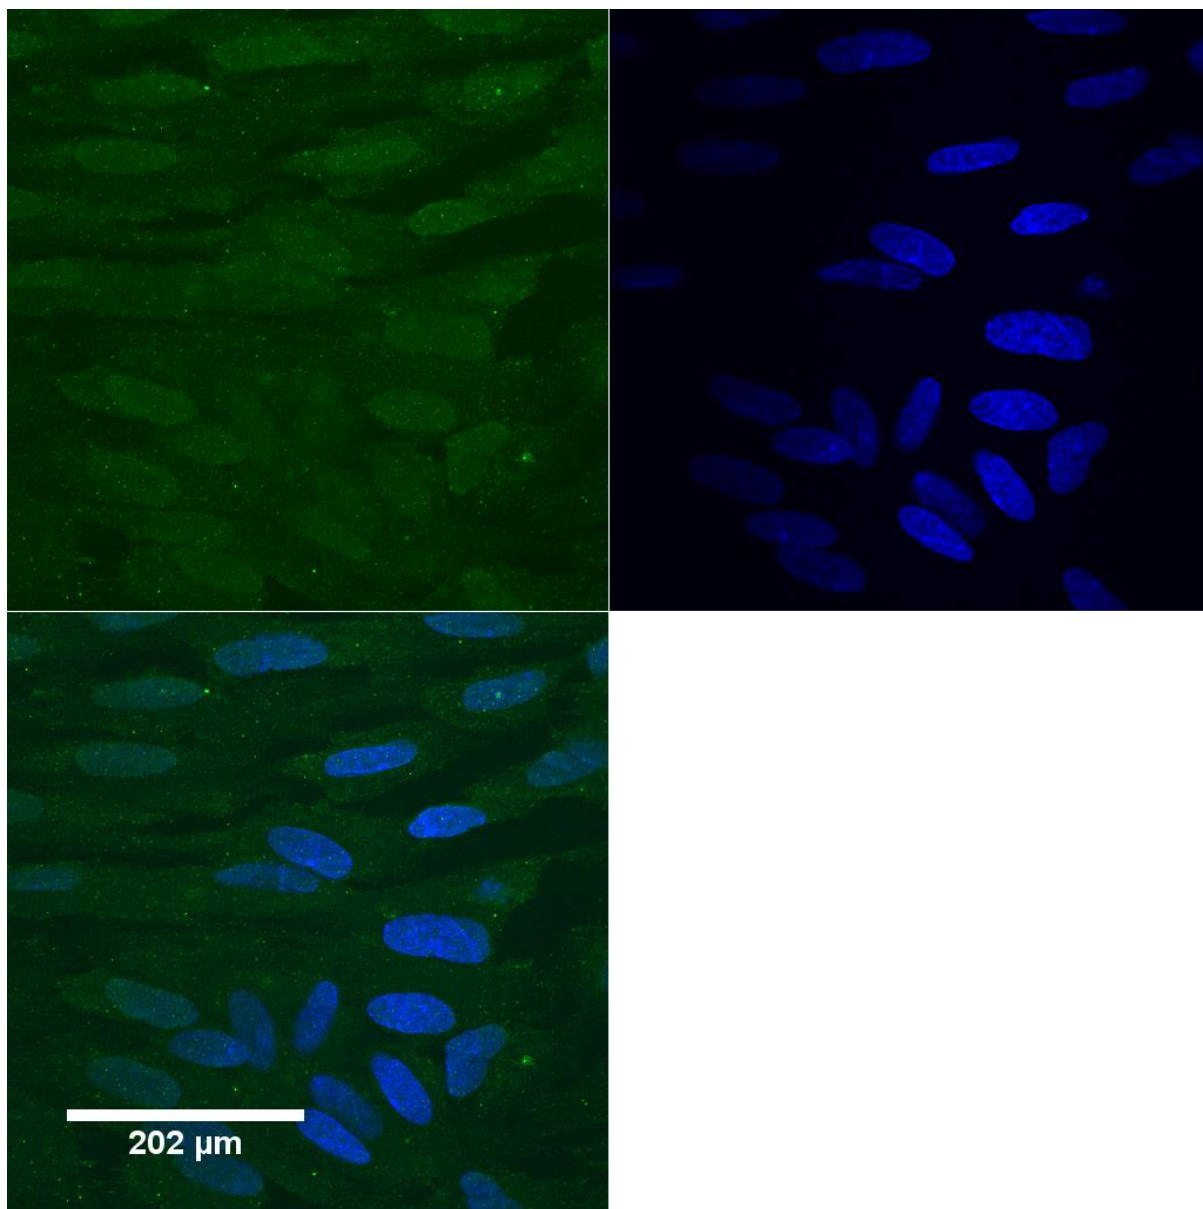

**Figure S2:** Confocal microscopy: perivascular marker VAP-1 (green); nuclei visualized with DAPI (blue). Image taken at 60 x magnification using a Zeiss Laser Scanning Microscope LSM 510. Scale bar represents 202 $\mu$ m.
